# Supplementary material for: OMI Total Column Water Vapor Version 4 Validation and Applications
Source: Copernicus journal article supplement (doi:10.5194/amt-2019-89), 2019-04-29
Supplement: Supplementary file 1 [file amt-2019-89-supplement.pdf]

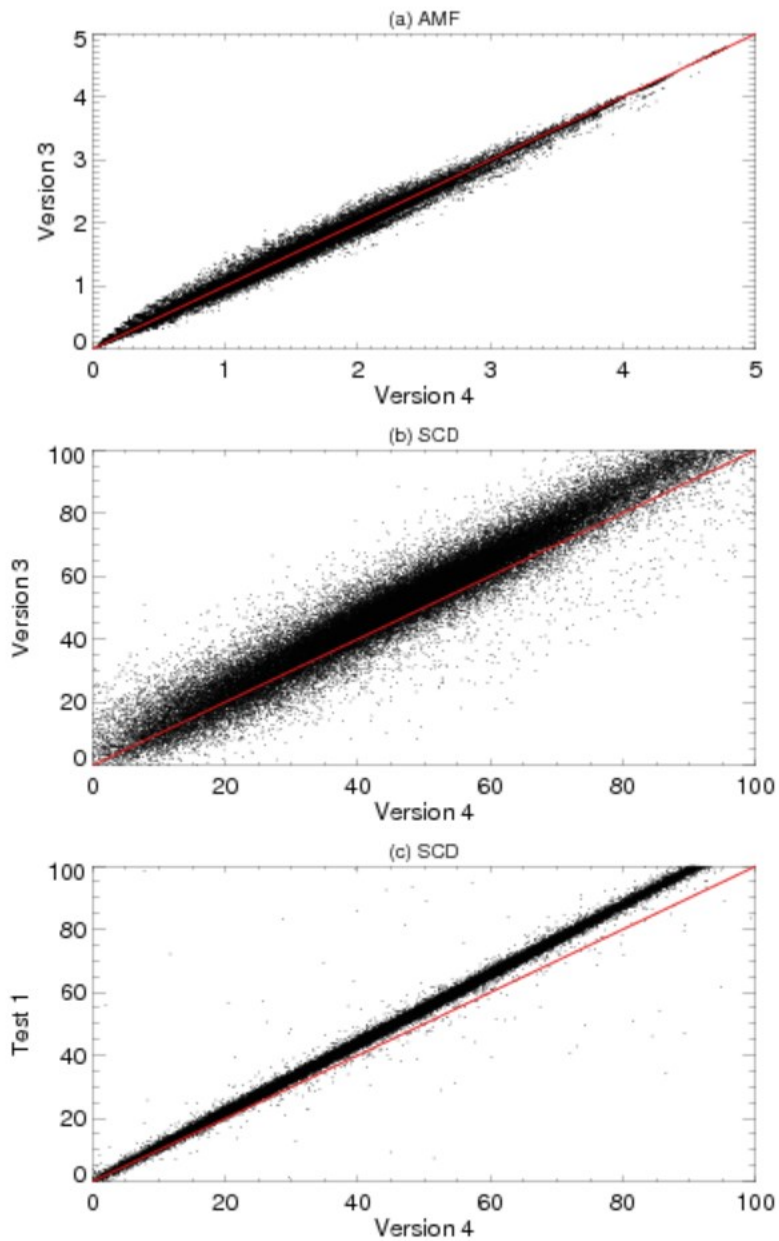

Supplementary Figure 1. (a) Version 4 versus Version 3 AMF comparison; (b) Version 4 versus Version 3 SCD comparison; (c) Version 4 versus Test 1 SCD comparison. Test 1 has the same setting as Version 4 except for the water vapor reference spectrum. Results are for OMI Orbit 10423.
